# Supplementary material
Source: publisher figshare collection journal article supplement (https://tandf.figshare.com/articles/dataset/_/9576944)
Supplement: Supplementary file 1 [file 1 › Supplementary Figure.pdf]

Supplemental Figure 1. Standard curves for growth factors in the multiplex bead-based immunoassay.

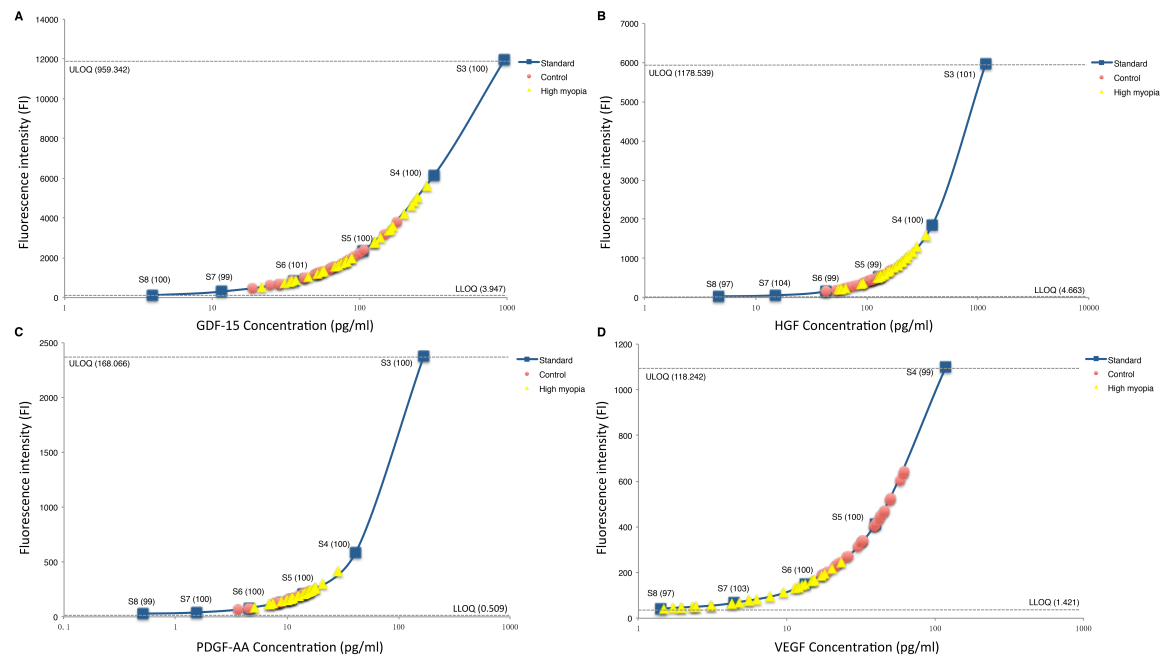

(The X-axis scale is not linear and the figure is in semi-log scale).

GDF-15: growth differentiation factor-15; HGF: hepatocyte growth factor;

PDGF-AA: platelet-derived growth factor; VEGF: vascular endothelial growth

factor; ULOQ: upper limit of quantification; LLOQ: lower limit of quantification.
