# Supplementary material
Source: publisher figshare collection journal article supplement (https://tandf.figshare.com/articles/dataset/_/9576944)
Supplement: Supplementary file 1 [file 1 › Supplementary Table.pdf]

Supplemental Table 1. Concentrations of 40 growth factors in aqueous humor of high myopic eyes and controls in the primary screening.

| Cytokines (pg/ml) | High myopia   | Control      | P-value | Min.  | Max.    |
|-------------------|---------------|--------------|---------|-------|---------|
| GDF-15            | 170.90        | 79.00        | 0.03    | 1.7   | 4,000   |
| HGF               | 336.46        | 143.47       | 0.03    | 7.1   | 8,000   |
| PDGF-AA           | 143.45        | 76.00        | 0.03    | 7.9   | 20,000  |
| VEGF              | 23.13         | 69.90        | 0.03    | 11.1  | 20,000  |
| BMP-5             | <i>140.74</i> | <i>20.10</i> | 0.03    | 307.6 | 200,000 |
| BMP-7             | <i>57.90</i>  | <i>31.63</i> | 0.03    | 73.8  | 80,000  |
| HB-EGF            | <i>1.36</i>   | <i>0.73</i>  | 0.05    | 8.3   | 20,000  |
| NT-3              | <i>28.70</i>  | <i>17.13</i> | 0.10    | 40.5  | 80,000  |
| IGFBP-1           | 106.02        | 38.37        | 0.10    | 9.4   | 10,000  |
| IGFBP-2           | 11636.48      | 9045.03      | 0.10    | 135.7 | 40,000  |
| IGFBP-6           | 11419.16      | 8267.17      | 0.10    | 104.0 | 200,000 |
| b-NGF             | <i>0.32</i>   | <i>0.20</i>  | 0.16    | 6.0   | 20,000  |
| FGF-4             | 298.16        | 248.77       | 0.18    | 175.8 | 200,000 |
| IGFBP-3           | 1231.70       | 812.50       | 0.18    | 392.1 | 400,000 |
| MCF R             | 651.84        | 467.50       | 0.18    | 46.7  | 80,000  |
| OPG               | 71.54         | 42.67        | 0.18    | 2.9   | 8,000   |
| TGFb1             | 423.08        | 192.07       | 0.18    | 413.7 | 200,000 |
| EGF               | <i>0.10</i>   | <i>0.13</i>  | 0.20    | 0.2   | 400     |
| PIGF              | <i>2.26</i>   | <i>1.83</i>  | 0.23    | 3.3   | 8,000   |

|         |        |         |      |       |         |
|---------|--------|---------|------|-------|---------|
| NGF R   | 24.84  | 18.67   | 0.30 | 20.5  | 20,000  |
| TGFa    | 0.26   | 0.13    | 0.36 | 2.5   | 20,000  |
| TGFb3   | 1.06   | 0.57    | 0.44 | 17.3  | 80,000  |
| IGF-I   | 35.30  | 21.10   | 0.45 | 93.8  | 40,000  |
| EGF R   | 202.80 | 206.63  | 0.45 | 8.3   | 20,000  |
| bFGF    | 790.34 | 1204.47 | 0.46 | 102.8 | 40,000  |
| EG-VEGF | 7.38   | 6.87    | 0.46 | 8.9   | 20,000  |
| Insulin | 154.72 | 110.07  | 0.46 | 94.4  | 40,000  |
| NT-4    | 13.38  | 11.70   | 0.46 | 12.3  | 20,000  |
| SCF R   | 274.48 | 218.00  | 0.46 | 80.0  | 40,000  |
| VEGF R3 | 13.78  | 12.90   | 0.46 | 40.3  | 80,000  |
| VEGF-D  | 6.78   | 3.60    | 0.46 | 23.1  | 40,000  |
| GDNF    | 5.26   | 4.70    | 0.55 | 7.0   | 8,000   |
| BMP-4   | 60.72  | 60.90   | 0.66 | 42.6  | 200,000 |
| FGF-7   | 13.16  | 13.73   | 0.66 | 12.0  | 20,000  |
| GH      | 24.22  | 18.20   | 0.66 | 17.8  | 20,000  |
| IGFBP-4 | 102.00 | 91.83   | 0.66 | 152.1 | 400,000 |
| SCF     | 2.32   | 2.10    | 0.66 | 5.9   | 20,000  |
| VEGF R2 | 96.78  | 83.23   | 0.66 | 14.5  | 20,000  |
| BDNF    | 0.64   | 0.65    | 0.88 | 1.9   | 4,000   |
| AR      | 19.01  | 18.65   | 0.88 | 11.7  | 20,000  |

---

Min. and Max. refer to the detection range for the 40 growth factors examined

in this assay according to the manufacturer's instructions. Numbers in italics refer to those below the lower limit of quantification.
